# Supplementary material for: Propensity to endoplasmic reticulum stress in deer mouse fibroblasts predicts skin inflammation and body weight gain
Source: Oxford University Press journal article supplement (doi:10.1242/dmm.049113), 2021-10-01
Supplement: dmm049113supp.pdf [file dmm049113supp.pdf]

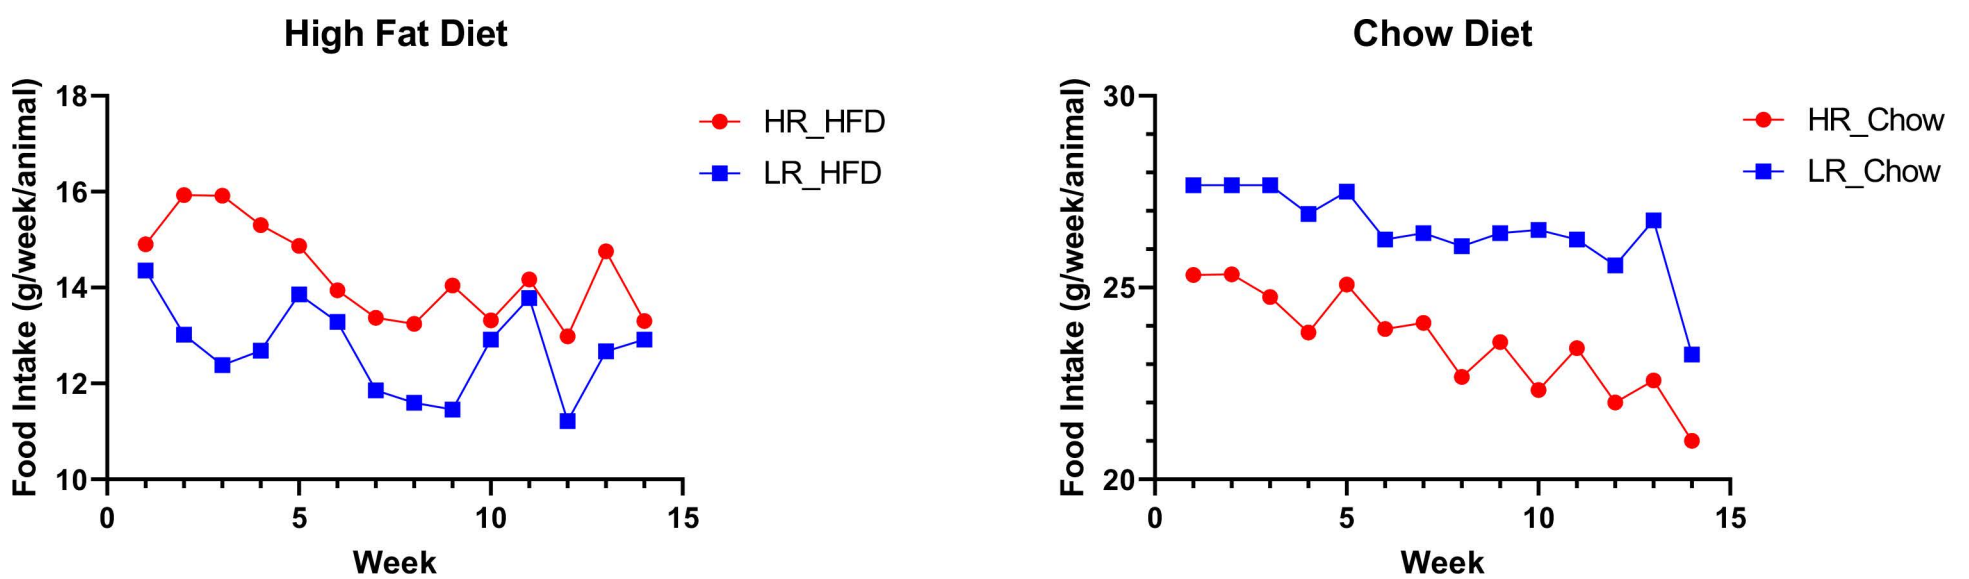

**Fig. S1. High-fat diet or regular chow diet intake in HR (n=10, males) or LR (n=9, males) deer mice.** The food consumption measured every week for each group of animals as they are required to be housed together.

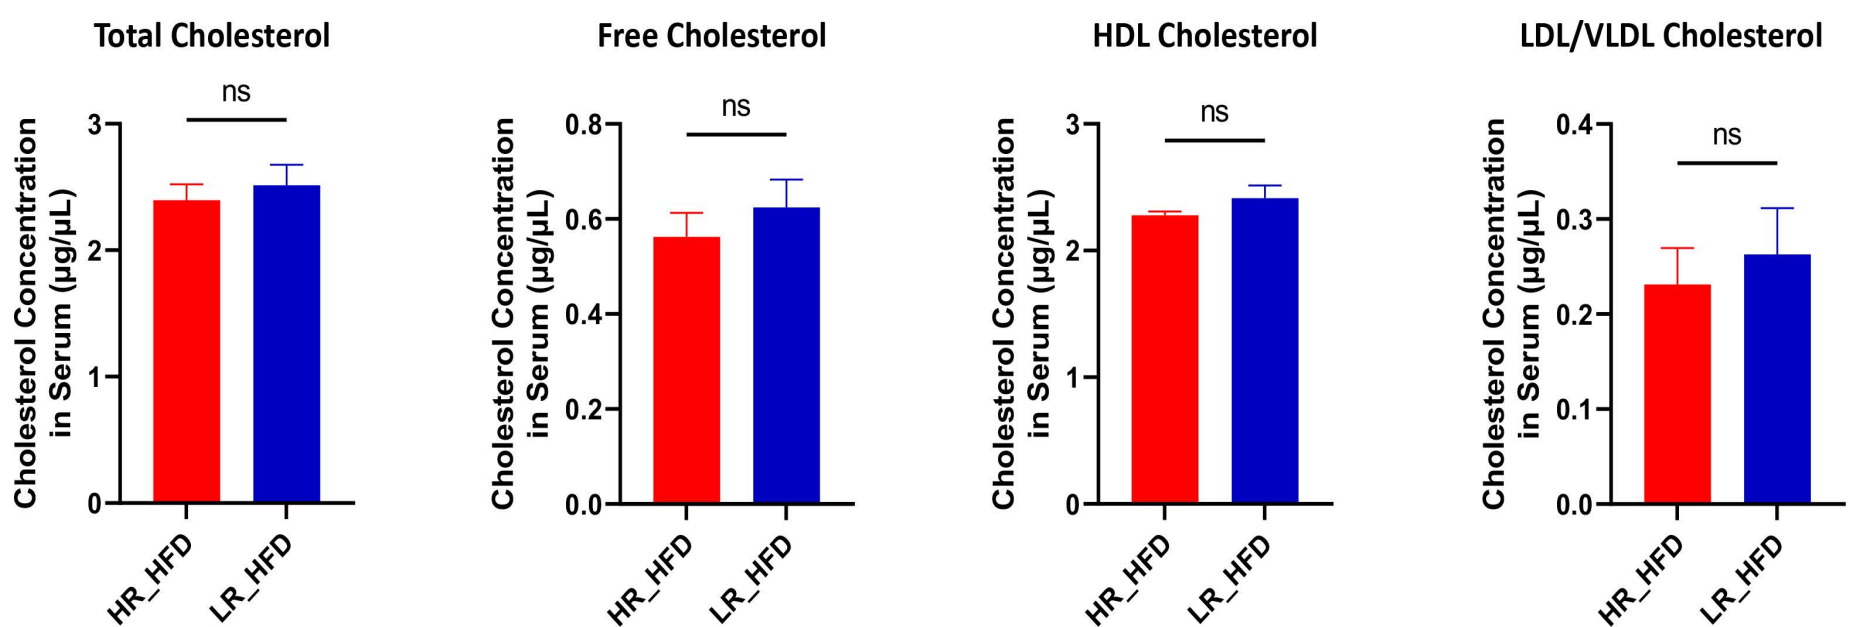

**Fig. S2. Cholesterol levels in sera of deer mice fed with the HFD.** The total, free, HDL and LDL/VLDL cholesterol concentrations in high (n=5, males) and low (n=5, males) responders of deer mice after 14 weeks of the HFD consumption measured by a cholesterol assay kit. The P values were calculated with unpaired t-test and none of them was statistically significant.

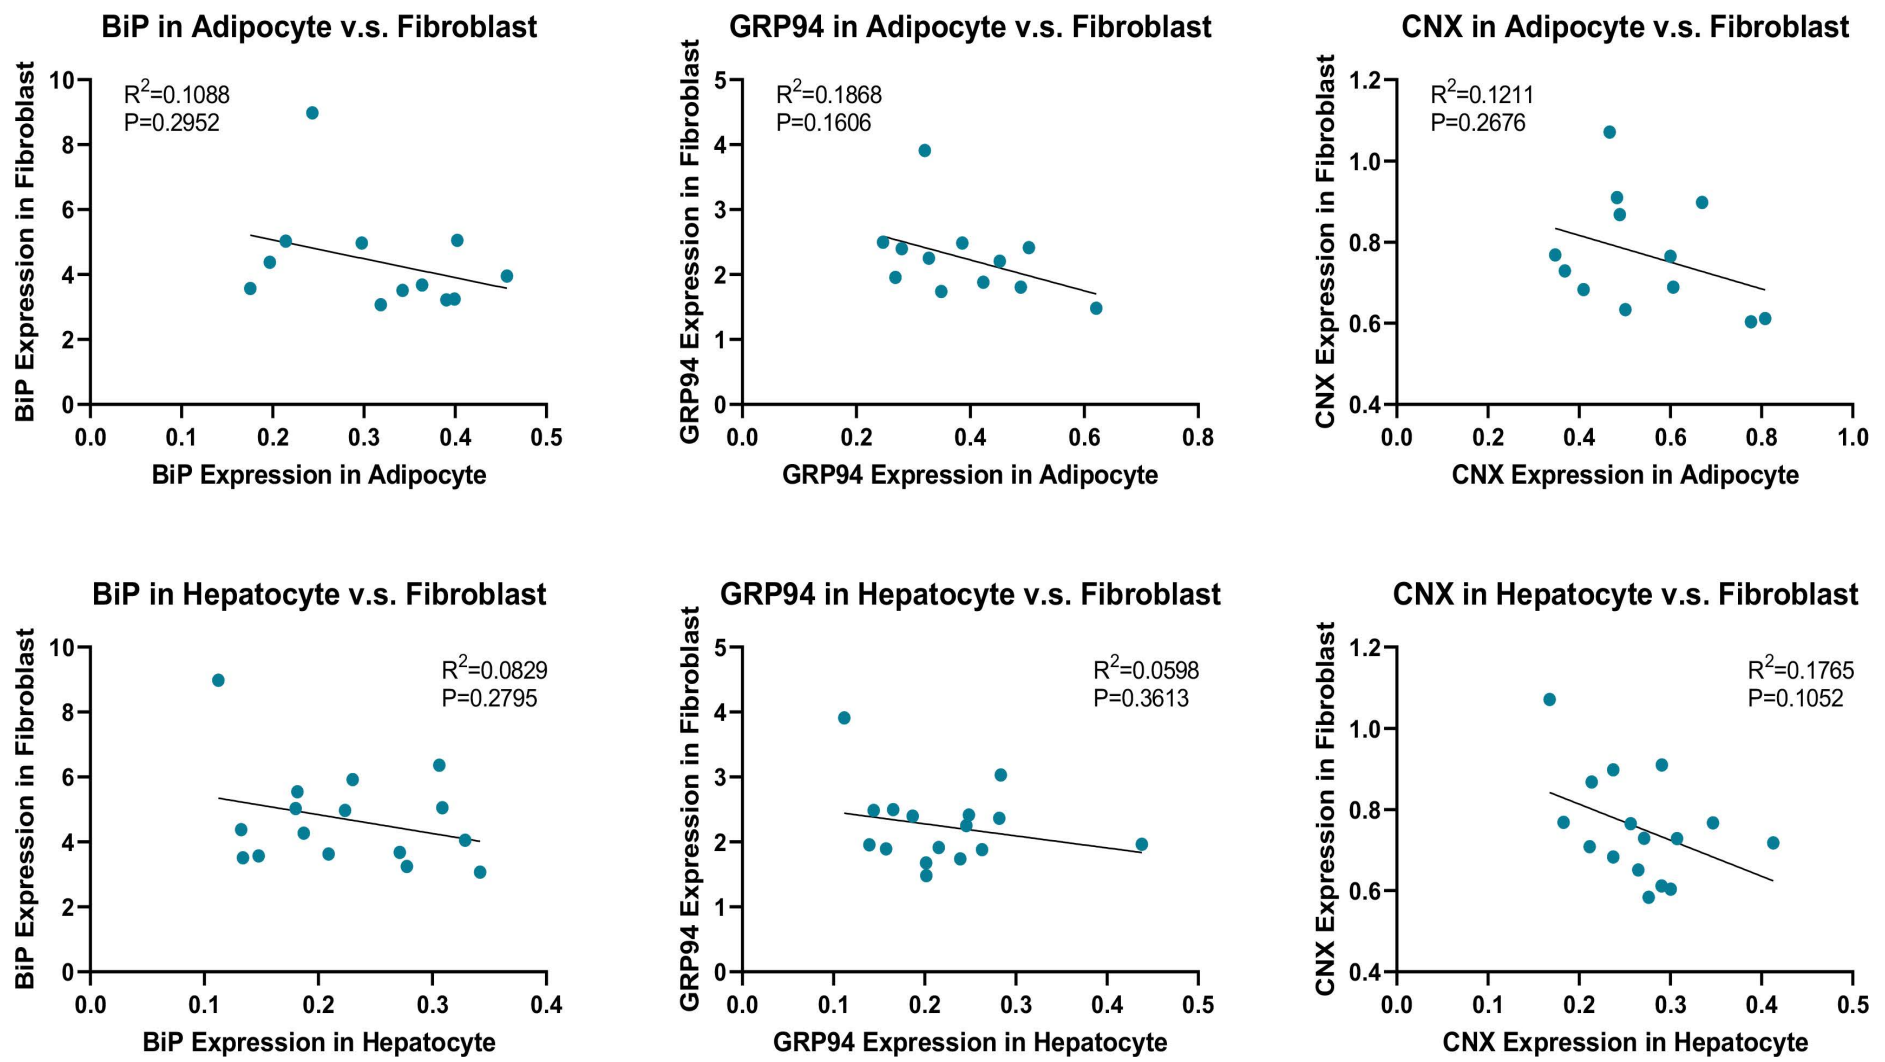

**Fig. S3. Chaperone expression in cultured fibroblasts and peripheral tissues.** Correlation of ER chaperones (BiP, GRP94 and CNX) expression between primary fibroblasts treated with tunicamycin and adipocytes/hepatocytes of deer mice after the HFD consumption measured by RT-qPCR. R square values from Pearson's correlation and P-values are shown.
